# Supplementary material for: MSCA: a spectral comparison algorithm between time series to identify protein-protein interactions
Source: PubMed Central journal article supplement (PMC4448560; doi:10.1186/s12859-015-0599-8), 2015-05-13
Supplement: 12859_2015_599_MOESM1_ESM.pdf [file 12859_2015_599_MOESM1_ESM.pdf]

**Supplementary Material S1, S2, S3, S4, S5, S6, and S7: MSCA: A spectral comparison algorithm between time series to identify protein-protein interactions.**

**Supplementary S1:** Validation through MSCA for MAGI1 interactions under 8 physicochemical descriptors for 1 set of 279 sequences. Proteins are sorted according to their spectral similarity with the sequence query, similarities above 0.7 are shown. Occurrences are as a follow. Red: PPI experimentally recognized for human MAGI1 (15 times); Green: kinases; Blue: cell-cell adhesion proteins (22 times). NET1, ARHGAP6, ARHGEF16, FZD4 and CYSLTR2 are G protein related Rho signaling (11 times). NFAT: (7 times); STATs: (6 times) and CREBs: (6 times). \* PPI experimentally recognized for group 1 (15 times).

The others 3 different sets had 218 sequences each one. \* PPI experimentally recognized for the others groups were as a follow: group 2 (10 times); group 3 (12 times); group 4 (12 times). NET1, ARHGAP6, ARHGEF16, FZD4, CYSLTR2 and ARHGEF7 are G protein related Rho signaling. Green: kinases.

Group 1

| Descriptors | HYDRO       | P2          | SASA        | NCISC       | EIIP         | IC          | H085         | H371         |
|-------------|-------------|-------------|-------------|-------------|--------------|-------------|--------------|--------------|
| Query       | <u>MAG1</u> | <u>MAG1</u> | <u>MAG1</u> | <u>MAG1</u> | <u>MAG1</u>  | <u>MAG1</u> | <u>MAG1</u>  | <u>MAG1</u>  |
| 1           | NFAT2       | MAP4K4      | PTK2        | PI3KIBG     | PI3KRB       | TANC1       | MAP4K4       | APBA1        |
| 2           | ABC1*       | AFAP1       | ANDR        | TANC1       | CD22         | NFAT4       | PDK11        | B-raf        |
| 3           | CREB1       | HIF1B       | MAP3K13     | RAF         | LRFN3        | STAT2       | AFAP1        | PI3KIBR5     |
| 4           | ATF4        | NFAT2       | IKKa        | MAP2K2      | TRAF6        | HIF1B       | HIF1B        | Nfkappaβ     |
| 5           | IKKb        | MAP3K13     | PI3KIBG     | STAT2       | SMAD2        | ARHGAP6*    | ACVL1        | SFR          |
| 6           | SP1         | JAK2        | HIF1B       | NET1*       | TRIF         | PI3KIBG     | STK          | Ser/threN2   |
| 7           | NET1*       | PKNN3       | SMAD4       | Sgk31       | PI3KB        | CD166       | PKAα1        | Amyloid β A4 |
| 8           | SFR         | ATF6β       | P65         | PI3KRG      | MADCA        | TRAF5       | Amyloid β A4 | STK          |
| 9           | CDC25B      | NFAT2       | ATF6β       | JAK1        | MAPKAPK3     | B-raf       | PI3KRB       | SMAD3        |
| 10          | MAP3K8      | CADH1       | ITB2        | Mdm2        | PI3KIBG      | HIF1A       | junD         | TRADD        |
| 11          | PAK1        | ABC1*       | MAP4K4      | CYSLTR2*    | AKT1         | PITX2       | STAT5B       | SGK12        |
| 12          | AMBP        | ARHGAP6*    | NFAT2       | GLUT7       | FZD4*        | NUR77       | HIF1A        | PI3KIBG      |
| 13          | Ser/threN2  | MAP3K11     | STAT2       | SGK12       | MAP2K4       | ACTN        | PKCZ2        | IKKa         |
| 14          | ELF4E       | ADA10       | PI3KD       | TRAF2       | ESAM*        | ATF6β       | CYSLTR2*     | MAPKAPK3     |
| 15          | FZD4*       | MAP3K12     | HIF1A       | MAP3K3      | ITB2         | JunD        | RPS6KA4      | MAPK13       |
| 16          | ICAM2       | Sgk2        | NET1*       | MAPKAPK5    | STAT5B       | PI3KB       | ATF6β        | SMAD5        |
| 17          | GLUT7       | MAP3K5      | Mdm2        | MARCH3*     | JAK3         | JAM1        | TRAF3        | P100         |
| 18          | CYSLTR2*    | IKKa        | PAK1        | MAP3K6      | E2F4         | MAP3K73     | MAP3K11      | NFAT2        |
| 19          | MADCA       | ARHGEF16    | PKCβ2       | PAK1        | NFAT2        | MADCA       | MAP3K1       | RPS6KA4      |
| 20          | CASP3       | STAT5A      | CADH1       | AKTRACA     | Amyloid β A4 | PAK2        | JAK1         | TMEM215*     |

Group 2

| Descriptor | HYDRO        | P2           | SASA         | NCISC        | EIIP         | IC           | H085         | H371         |
|------------|--------------|--------------|--------------|--------------|--------------|--------------|--------------|--------------|
| Query      | <u>MAGI1</u> | <u>MAGI1</u> | <u>MAGI1</u> | <u>MAGI1</u> | <u>MAGI1</u> | <u>MAGI1</u> | <u>MAGI1</u> | <u>MAGI1</u> |
| 1          | TFE2         | HLTF         | HLTF         | TANC1        | SP202        | TANC1        | POU2F2       | SALL         |
| 2          | ELF1         | GTF2I        | ELOA2        | DMTF1        | PBX1         | SRBP1        | AP2A         | SNPC4        |
| 3          | ABC1*        | MITF         | NFAT5        | MYT1         | REST         | ATF7         | NFYC         | TRPS1        |
| 4          | VEZF1        | REST         | ITF2         | NET1*        | POU6F2       | ARHGAP6*     | POU2F3       | POU3F3       |
| 5          | ATF4         | SP202        | MCAF1        | DMRTA        | OLIG2        | TF3C3        | TFCP2        | BAZ1B        |
| 6          | DMRT2        | SRBP2        | DMTF1        | PHTF1        | RUNX2        | UBF1         | PBX4         | POU4F3       |
| 7          | P5F1B        | SNPC4        | CARTF        | CYSLTR2*     | TBX4         | TBX20        | CYSLTR2*     | PHTF1        |
| 8          | TF7L1        | ABC1         | REST         | GLUT7        | TBX19        | TF3C1        | PHTF1        | POU3F2       |
| 9          | NET1*        | ARHGAP6*     | MITF         | HSFY1        | FOXE3        | NFYC         | TBX20        | POU4F1       |
| 10         | DMRTA        | PHTF2        | SRBP2        | TFB2M        | POU4F3       | MTF2         | ZN384        | FOXC1        |
| 11         | USF2         | MCAF1        | ELF1         | BT3L2        | POU5F1       | MTF1         | POU6F1       | LMX1A        |
| 12         | T2EB         | T2H2L        | SP202        | MARCH3*      | VEZF1        | HSF1         | AKNA         | OLIG1        |
| 13         | DIDO1        | DMRT1        | HSF1         | ERCC2        | DMRTA        | TBX19        | POU5F1       | FOXS1        |
| 14         | DMRT3        | IRF9         | BBX          | TF2AA        | FZD4*        | ZN384        | LMX1B        | TFB2M        |
| 15         | POU4F3       | TBX2         | NET1*        | T2FA         | DMTA2        | BAZ1B        | FOXF1        | AP2A         |
| 16         | ERCC3        | ITF2         | FOXN1        | POU2F1       | POU3F4       | TBX4         | TFB1M        | SPDEF        |
| 17         | USF1         | USF2         | BT3L1        | GTD2A        | GATA2        | PHTF1        | MTF2         | POU5F1       |
| 18         | PITX2        | ARHGEF16     | POU3F4       | DIDO1        | SRBP2        | NFIB         | ELF2         | ELOA2        |
| 19         | BAZ1B        | E4F1         | DMRT1        | KLF1         | POU5F2       | POU6F1       | ELF3         | TF3C1        |
| 20         | POU4F2       | BAZ1B        | USF1         | TF3C4        | TF3C1        | NFX1         | HINFP        | DMTA2        |

Group 3

| Descriptor Query | HYDRO        | P2              | SASA         | NCISC           | EIIP         | IC              | H085            | H371            |
|------------------|--------------|-----------------|--------------|-----------------|--------------|-----------------|-----------------|-----------------|
|                  | <u>MAGI1</u> | <u>MAGI1</u>    | <u>MAGI1</u> | <u>MAGI1</u>    | <u>MAGI1</u> | <u>MAGI1</u>    | <u>MAGI1</u>    | <u>MAGI1</u>    |
| 1                | RHG35        | KDM4A           | KDM4A        | MED13           | RON          | TANC1           | ZN521           | CTND1           |
| 2                | GATA6        | HDAC4           | HDAC4        | GLI2            | ZN521        | EPAS1           | PUF60           | SP8             |
| 3                | NFAC1        | HDAC5           | SMCA5        | TANC1           | GATA6        | ZBED6           | GATA6           | NR4A2           |
| 4                | E2F3         | ZBT17           | ZN155        | TF2L1           | HXB2         | NR4A2           | NCUG1           | SP20H           |
| 5                | MLXPL        | RON             | HDAC5        | CSKP            | EF1A1        | <b>ARHGAP6*</b> | RHG35           | FOXN4           |
| 6                | HXA10        | MGAP            | MGAP         | E2F6            | MET          | SOX7            | NR2F6           | ZN521           |
| 7                | CTCF         | NFAC1           | Z280D        | <b>NET1*</b>    | ZSC31        | CTND1           | FOXP2           | TCEA3           |
| 8                | <b>ABC1*</b> | <b>ABC1*</b>    | BCL6         | KLF10           | XRCC6        | LZTL1           | ATOH8           | HXD13           |
| 9                | PHC2         | <b>ARHGAP6*</b> | NFAC1        | <b>CYSLTR2*</b> | <b>FZD4*</b> | MGAP            | <b>CYSLTR2*</b> | LZTL1           |
| 10               | TCEA3        | MED13           | BARX2        | GLUT7           | Z280A        | RBPJL           | MET             | EPAS1           |
| 11               | FOXJ2        | MYBB            | <b>NET1*</b> | NACAD           | CSKP         | CSKP            | LZTL1           | HXA1            |
| 12               | KLF5         | TAF6            | NOBOX        | RHG35           | PUF60        | Z280A           | NOBOX           | MESP2           |
| 13               | <b>NET1*</b> | <b>ARHGEF16</b> | TEAD         | Z280D           | ZN268        | NDF1            | TAB3            | SP110           |
| 14               | BTK          | SOLH1           | CTCF         | ZN283           | LHX8         | AKND1           | SALL4           | SEBOX           |
| 15               | SP20H        | GATA4           | PARP1        | CHCH3           | CTND1        | Z280B           | NRF1            | RAB23           |
| 16               | FX4L1        | FOXO6           | MED17        | ZKSC3           | SP110        | MYB             | NOC2L           | NDF1            |
| 17               | HXD11        | SP110           | TAF6         | <b>MARCH3*</b>  | NACAD        | RON             | ZN253           | LHX8            |
| 18               | HLX          | SOX6            | SATB1        | ZN229           | NFAC1        | TCEA3           | NECD            | NFAC1           |
| 19               | KLF10        | BARX2           | ZBT17        | GABPA           | RFX1         | ZN229           | <b>ARHGEF7</b>  | SOX13           |
| 20               | HXB2         | ZBED6           | HXD13        | MGAP            | SRCAP        | FOXN3           | ZSC31           | <b>TMEM215*</b> |

Group 4

| Descriptors | HYDRO        | P2           | SASA         | NCISC        | EIIP         | IC           | H085         | H371         |
|-------------|--------------|--------------|--------------|--------------|--------------|--------------|--------------|--------------|
| Query       | <u>MAGI1</u> | <u>MAGI1</u> | <u>MAGI1</u> | <u>MAGI1</u> | <u>MAGI1</u> | <u>MAGI1</u> | <u>MAGI1</u> | <u>MAGI1</u> |
| 1           | IRX3         | WDR60        | ZHX1         | TANC1        | STON1        | TANC1        | RPS6KA4      | MED24        |
| 2           | ESR1         | SOX5         | ZMYM2        | RAF1         | SALL3        | ENC1         | DEDD2        | ZBTB4        |
| 3           | ABC1*        | MED24        | BRD8         | WDR11        | ZN148        | MED24        | WDR11        | NAB2         |
| 4           | WDR60        | ABC1*        | PLK1         | S6OS1        | ZN226        | SOX5         | RD23B        | KLF8         |
| 5           | TEAD1        | ARHGAP6*     | BACH1        | MED24        | MED23        | ARHGAP6*     | STAT5B       | CREM         |
| 6           | NKX23        | UBR5         | ITCH         | PFD4         | IRF5         | HDAC7        | ZBED1        | HXC10        |
| 7           | SOX17        | PIAS1        | MDM2         | NET1*        | SMAD2        | EZH2         | MTG8         | DLX3         |
| 8           | HXA3         | SPOP         | SOX5         | MDM2         | ETS2         | UBR5         | GATA5        | ETS2         |
| 9           | MNDA         | MTPN         | TCF25        | NCOR1        | PLK1         | HXA2         | CLTR2        | SOX21        |
| 10          | NET1*        | MED23        | NR2C2        | CLTR2        | PIAS1        | HIF1N        | DLX5         | ZN444        |
| 11          | SOX11        | BACH1        | MED24        | GLUT7        | GATA5        | NLTP         | CREM         | ZN226        |
| 12          | ZN444        | BRD8         | WWP2         | SALL3        | DACH2        | TAF5L        | HXA3         | ZBED1        |
| 13          | COE3         | ARHGEF16     | EYA2         | ZHX1         | ZBTB4        | HXB9         | ARHGEF7      | ZN398        |
| 14          | DLX5         | T22D1        | SPOP         | MNDA         | SOX17        | NR1I2        | CLD18        | HES1         |
| 15          | HXC10        | PRDM4        | MCM8         | MARCH3*      | SOX4         | RPB11        | BCL10        | IRX3         |
| 16          | ZHX1         | STAT5A       | PIAS1        | SDCB1        | FZD4*        | NR1H4        | HES2         | SIR1         |
| 17          | TAF10        | RUVB2        | RPAB2        | RPS6KA5      | HXA3         | HXD8         | SOX21        | CCND1        |
| 18          | HXA11        | REQU         | NET1*        | SOX30        | HXD1         | MNDA         | HXC9         | IRF5         |
| 19          | ZN148        | RPAB2        | KPCE         | ZN410        | VSX1         | CCND1        | CDCA4        | ZN148        |
| 20          | FZD4*        | SOX8         | HDAC7        | REQU         | STAT5B       | HXB5         | PIAS1        | TMEM215*     |

**Supplementary S2:** Validation through MSCA for SCRIB interactions under 8 physicochemical descriptors for 1 set of 279 sequences. Proteins are sorted according to their spectral similarity with the sequence query, similarities above 0.7 are shown. Occurrences are as a follow. Red: PPI experimentally recognized for human SCRIB (19 times); Green: kinases; Blue: cell-cell adhesion proteins (17 times).  $\beta$ PIX, ARHGAP6, FZD4, CYSLTR2, RAS are G protein related Rho signaling (13 times). STATs: (8); CREBs: (9). \* PPI experimentally recognized (19 times).

The others 3 different sets had 218 sequences each one. \* PPI experimentally recognized for the others groups were as a follow: group 2 (19 times); group 3 (18 times); group 4 (16 times). NET1, ARHGAP6, ARHGEF16, FZD4, CYSLTR2 and are G protein related Rho signaling. Green: kinases.

Group 1

| Descriptors | EIIP         | IC           | P001         | H085         | H371          | HYDRO        | VSC           | P1           | P2           |
|-------------|--------------|--------------|--------------|--------------|---------------|--------------|---------------|--------------|--------------|
| Query       | <u>SCRIB</u> | <u>SCRIB</u> | <u>SCRIB</u> | <u>SCRIB</u> | <u>SCRIB</u>  | <u>SCRIB</u> | <u>SCRIB</u>  | <u>SCRIB</u> | <u>SCRIB</u> |
| 1           | PI3KRB       | RELB         | ICAM1        | PTK2         | LRFN3         | MAP3K1       | MAP4K4        | MAP3K1       | MAP3K5       |
| 2           | TRIF         | CD166        | STAT3        | HIF1B        | IKba          | PKCα*        | HIF1A         | TANC1*       | STAT4        |
| 3           | FZD4         | ARHGAP6*     | ERK          | PKNN3        | TMEM215*      | PI3KIA       | PKNN3         | ABC1*        | RELA(P65)    |
| 4           | S6kinaseβ2   | CEBPB        | CREB1        | HIF1A        | R-Ras         | ABC1*        | STAT1         | CADH1        | βPIX*        |
| 5           | MADCA        | ANGL3        | PTK2         | Amyloid β A4 | CEBPB         | MAP4K4       | JAK3          | TMEM215*     | JAK2         |
| 6           | MAPKAPK3     | TMEM215*     | MAPK13       | PKAα         | NFAT4         | SP1          | PI3KIBG       | MAPKAPK3     | PI3KIBG      |
| 7           | PTK2         | PKCα*        | PI3KB        | PKCα*        | MAP3K6        | AMBP         | ATF6β         | SGk2         | AJUBA        |
| 8           | STAT1        | 2AAA         | ABC1*        | MAP3K73      | PI3KD         | FOS          | ADA10         | RAC3         | CK2          |
| 9           | CDC42        | GLUT7*       | CD22         | ADA10        | MEF2C         | MAP3K13      | forkheadboxO3 | M-Ras1       | ATF-6β       |
| 10          | ARHGAP6*     | CK2          | MARCH3*      | βPIX*        | MAP3K5        | CREB1        | MAP3K1        | MAPK8        | MAP4K1       |
| 11          | AJUBA        | S6kinaseβ1   | RXR          | PI3KRB       | ELF4B         | MAP3K7       | AFAP1         | MARCH3*      | MYC          |
| 12          | CREB5D       | MAP3K73      | SGK2         | MAP3K72      | PDK1          | AJUBA        | CREB1         | SOX2         | MAP4K4       |
| 13          | RAC1         | AJUBA        | CREB2/2      | CYSLTR2*     | MAPK9         | SMAD9        | PTK2          | HIF1B        | ELK4         |
| 14          | ESAM         | caspase-9    | AFAP1        | AKTRACA      | E2F5          | IKKb         | PDK1          | PI3KIBR5     | STK          |
| 15          | TRAF6        | PKCZ2        | TAX*         | TRAF3        | forkheadboxO3 | E2F4         | CREB4         | ICAM2        | S6kinaseβ2   |
| 16          | MARCH3*      | SMAD5        | NFAT4        | ELF4E1B      | MADCA         | S6kinaseβ1   | MAP3K6        | GAD153       | caspase-9    |
| 17          | NFAT-2       | STAT6        | CREB3B       | MAP3K7       | RELB          | STAT1        | STAT5A        | RAC1         | M-Ras1       |
| 18          | Ser/threN2   | ELF4E        | JAK3         | AFAP1        | SMAD6         | RELB         | ITB2          | CDK1         | STAT5B       |
| 19          | MAPKAPK2     | ELK4         | HIF1B        | MAP3K11      | AKT2RACβ      | ICAM2        | TRIF          | TIRAP        | CDC25B       |
| 20          | TMEM215*     | ACTN1        | ITB2         | PKCZ2        | MAPK11        | CEBPB        | βPIX*         | Mdm2         | TRAF2        |

Group 2

| Descriptors | EIIP            | IC              | P001           | H085            | H371            | HYDRO         | VSC              | P1              | P2           |
|-------------|-----------------|-----------------|----------------|-----------------|-----------------|---------------|------------------|-----------------|--------------|
| Query       | <u>SCRIB</u>    | <u>SCRIB</u>    | <u>SCRIB</u>   | <u>SCRIB</u>    | <u>SCRIB</u>    | <u>SCRIB</u>  | <u>SCRIB</u>     | <u>SCRIB</u>    | <u>SCRIB</u> |
| 1           | SP202           | TFE2            | ELOA2          | SRBP1           | NFAT5           | NFX1          | MCAF1            | SNPC4           | TF2H2        |
| 2           | SNPC4           | <b>ARHGAP6*</b> | ITF2           | LMX1B           | POU4F1          | POU6F2        | MITF             | TF3C1           | REST         |
| 3           | <b>FZD4</b>     | TBX20           | EA3L2          | MTF2            | MCAF1           | MYT1          | KLF16            | <b>TANC1*</b>   | T2H2L        |
| 4           | NFX1            | SRBP2           | TF2H1          | REST            | POU3F4          | TRPS1         | DMRT2            | <b>ABC1*</b>    | <b>βPIX*</b> |
| 5           | TCF7            | <b>TMEM215*</b> | TF3C2          | DMTF1           | OLIG3           | MYT1L         | <b>ARHGEF16*</b> | SNPC2           | USF2         |
| 6           | GATA2           | TBX18           | UBF1           | POU2F3          | TF3C6           | SALL          | CARTF            | ITF2            | EA3L1        |
| 7           | PITX2           | HSF1            | FOXD3          | BT3L3           | NFYC            | IRF9          | POU3F4           | NFIA            | TBX4         |
| 8           | FOXO3           | SNPC3           | T2FA           | TFCP2           | POU3F3          | <b>ABC1*</b>  | DMRT1            | MTF1            | ELOA3        |
| 9           | KLF13           | <b>GLUT7*</b>   | BX22           | <b>βPIX*</b>    | FOXC1           | MCAF1         | POU2F1           | POU6F2          | TF3C5        |
| 10          | HLTF            | TF7L2           | OLIG1          | COT2            | <b>TMEM215*</b> | FOXD2         | RUNX3            | DMRTC           | FOXD4        |
| 11          | BAZ1B           | KLF1            | ATF5           | PHTF2           | DMRT1           | ELF1          | UBF1             | DIDO1           | POU4F3       |
| 12          | FOXO4           | BX22            | SCX            | ZN384           | TBX18           | TF3C2         | ELF1             | RUNX2           | TF2H1        |
| 13          | DMTA2           | TF3C5           | RUNX3          | AP2A            | ELYS            | POU2F1        | ATF5             | HBP1            | ITF2         |
| 14          | POU6F2          | HINFP           | COT2           | <b>CYSLTR2*</b> | T2EB            | NFIX          | DMRTB            | ATF3            | UBF1         |
| 15          | OLIG2           | BT3L2           | <b>ABC1*</b>   | POU3F2          | POU4F3          | POU6F1        | HLTF             | DMRTB           | BT3L1        |
| 16          | FOXC1           | E4F1            | HBP1           | ATF6B           | GT2D1           | TYY1          | DMTA2            | SNPC1           | ELF2         |
| 17          | <b>ARHGAP6*</b> | POU6F1          | DMRT3          | TFB1M           | POU4F2          | TBX20         | BT3L1            | FOXO1           | POU2F2       |
| 18          | TBX4            | NFIB            | OLIG2          | POU5F1          | POU3F1          | T2EA          | TBX4             | POU3F2          | AP2A         |
| 19          | PBX1            | <b>TAX*</b>     | TFB1M          | NFYC            | BT3L1           | DMRT3         | NKX21            | USF1            | KLF13        |
| 20          | <b>MARCH3*</b>  | <b>βPIX*</b>    | <b>MARCH3*</b> | BT3L2           | HSF4            | <b>TANC1*</b> | POU2F3           | <b>TMEM215*</b> | ATF5         |



Group 3

| Descriptors<br>Query | EIIP         | IC             | P001         | H085           | H371         | HYDRO           | VSC          | P1           | P2           |
|----------------------|--------------|----------------|--------------|----------------|--------------|-----------------|--------------|--------------|--------------|
|                      | <u>SCRIB</u> | <u>SCRIB</u>   | <u>SCRIB</u> | <u>SCRIB</u>   | <u>SCRIB</u> | <u>SCRIB</u>    | <u>SCRIB</u> | <u>SCRIB</u> | <u>SCRIB</u> |
| 1                    | SALL4        | CMIP           | ZFY16        | RFX1           | AKND1        | KAT6A           | HDAC5        | KAT6A        | PUF60        |
| 2                    | EPAS1        | RON            | SREC         | PRDM2          | ZN223        | PKC $\alpha$ *  | PUF60        | HDAC5        | TFEB         |
| 3                    | SP110        | ARHGAP6*       | MED13        | PHC2           | MED13        | AN30B           | SP110        | MGAP         | $\beta$ PIX* |
| 4                    | FZD4         | BAZ2A          | KAT6A        | SALL4          | HXA1         | VAX1            | ZN711        | TANC1*       | RMP          |
| 5                    | NR4A2        | HLX            | RMP          | SMCA5          | FX4L1        | MED13           | FOXJ2        | RON          | SOX18        |
| 6                    | ZN112        | PRDM2          | GATA6        | GATA6          | TMEM215*     | ABC1* ARHGEF16* | AHRR         | FOXR2        |              |
| 7                    | GATA6        | TMEM215*       | AP2E         | RN19A          | FOXN3        | Z280D           | Z280D        | ABC1*        | WT1          |
| 8                    | PKHL1        | KLF5           | MESP2        | MET            | LZTL1        | SOX13           | RON          | FX4L5        | Z280D        |
| 9                    | AP2E         | NOBOX          | MSX2         | LZTL1          | NCUG1        | GATA6           | TAF11        | YAF2         | CSKP         |
| 10                   | Z280A        | GLUT7*         | SOX7         | PKC $\alpha$ * | SEBOX        | NOC2L           | SOX13        | NACAD        | RON          |
| 11                   | MED13        | PKC $\alpha$ * | MK01         | SP20H          | DACH1        | NUCG            | FOXP4        | PRCC         | PAX2         |
| 12                   | FOXR2        | ZN253          | FOXN3        | MLXPL          | VAX1         | SP7             | Z280A        | MED13        | TF3B         |
| 13                   | ZN268        | TCEA3          | HXD9         | FOXP2          | E2F3         | ZN155           | PAX2         | FER3L        | BARX2        |
| 14                   | ARHGAP6*     | TAF7           | BAZ2A        | TAB3           | RN19A        | ACAD            | FOXP2        | IRF3         | HDAC4        |
| 15                   | RN19A        | TAB3           | ZN711        | $\beta$ PIX*   | TCF21        | MESP2           | MED17        | MSX2         | MYBB         |
| 16                   | ZBT17        | KCC1D          | Z280B        | NOC2L          | EPAS1        | GABP1           | HXB3         | FOXH1        | ATOH8        |
| 17                   | HXD9         | SP8            | ABC1*        | ZEP1           | HXD13        | FIZ1            | EPAS1        | NCUG1        | CCNA1        |
| 18                   | ZN229        | TAF9B          | SOX13        | CYSLTR2*       | PTTG         | TANC1*          | SP7          | E2F3         | RBPJL        |
| 19                   | PUF60        | TAF11          | RHG35        | HXD11          | GATA6        | MET             | FOXR2        | HXB1         | CCND3        |
| 20                   | EF1A1        | ZSC31          | GSX2         | HXB7           | LHX8         | CTND1           | RMP          | TMEM215*     | E2F6         |

Group 4

| Descriptor | EIIP            | IC               | P001         | H085            | H371            | HYDRO        | VSC              | P1              | P2           |
|------------|-----------------|------------------|--------------|-----------------|-----------------|--------------|------------------|-----------------|--------------|
| Query      | <u>SCRIB</u>    | <u>SCRIB</u>     | <u>SCRIB</u> | <u>SCRIB</u>    | <u>SCRIB</u>    | <u>SCRIB</u> | <u>SCRIB</u>     | <u>SCRIB</u>    | <u>SCRIB</u> |
| 1          | RPB2            | MTG8             | HXB4         | PRD14           | SG3A1           | T22D1        | WWP2             | WDR60           | ADNP         |
| 2          | PCNA            | THOC2            | MED24        | <b>βPIX*</b>    | MCM8            | EDEM2        | ZHX1             | <b>TANC1*</b>   | STAT4        |
| 3          | STON1           | <b>ARHGAP6*</b>  | HXA2         | GATA5           | HES2            | ZMYM2        | ADNP             | SOX21           | THOC2        |
| 4          | <b>FZD4</b>     | NLTP             | NAB2         | DEDD2           | <b>TMEM215*</b> | MEIS2        | STA5A            | UBR5            | ZMYM2        |
| 5          | HXD1            | T22D1            | ZN398        | MTG8            | PAX6            | <b>ABC1*</b> | <b>PLK1</b>      | <b>ABC1*</b>    | <b>βPIX*</b> |
| 6          | ETS2            | PAX7             | DEDD2        | MNDA            | CDCA4           | HXC10        | NR2C2            | TAF10           | ENC1         |
| 7          | ZN226           | <b>RPS6KA4</b>   | MEIS2        | HXD1            | NCOR1           | HDAC9        | <b>ARHGEF16*</b> | HXA6            | PAX6         |
| 8          | COE3            | <b>ARHGEF16*</b> | HXD1         | GIT1            | ARX             | ADNP         | MED6             | SOX14           | VDR          |
| 9          | MTG8            | WNT16            | CTAG2        | <b>CYSLTR2*</b> | HXC10           | SG3A1        | SOX30            | ZBTB4           | MED6         |
| 10         | TEAD1           | NR1I2            | SOX17        | <b>RPS6KA4</b>  | SOX8            | DLX5         | KLF3             | CHRC1           | <b>GIT1*</b> |
| 11         | CCND2           | <b>GLUT7*</b>    | BCL10        | ITCH            | IRF2            | MTG8         | T22D1            | REQU            | NR0B2        |
| 12         | HDAC9           | TEAD2            | WDR60        | BCL10           | CTAG2           | WWP2         | CEBPG            | COE3            | IRF5         |
| 13         | <b>ARHGAP6*</b> | ZBED1            | DLX5         | THOC2           | GPER1           | HXA3         | ZBTB1            | <b>TMEM215*</b> | PRD14        |
| 14         | PPARD           | ETS2             | CCND1        | PPARD           | MDM2            | MNDA         | DEAF1            | HXC12           | TRAF1        |
| 15         | SG3A1           | RPB11            | <b>ABC1*</b> | RASH            | VDR             | HXD8         | HXC5             | HXB8            | T22D1        |
| 16         | <b>MARCH3*</b>  | PPARD            | CHRC1        | HDAC7           | KLF8            | CTDP1        | UBR5             | GSX1            | RHXF1        |
| 17         | NCOR1           | BACH1            | HXA3         | IRF5            | PTHY            | TEAD2        | TCF25            | HXA9            | HDAC7        |
| 18         | OTX2            | ENC1             | OTX2         | PHS             | HES1            | SIAH1        | DLX3             | CCND1           | MD2L2        |
| 19         | SOX17           | HXB9             | SOX4         | VDR             | TAF5L           | DLX3         | HXA11            | HXC8            | TN13B        |
| 20         | APEX1           | STON1            | HXC11        | HXA9            | WDR11           | JAZF1        | STAT4            | CEBPG           | ITCH         |

SCRIB-GIT1 interaction was recognized in reference (41)

**Supplementary S3:** Validation through MSCA for JAK1 interactions under 10 physicochemical descriptors for 1 set of 262 sequences. Proteins are sorted according to their spectral similarity with the sequence query, similarities above 0.7 are shown. Occurrences are as a follow. Red: STATs family (13 times); Green: kinases; Blue: cell-cell adhesion proteins (17 times). TRAF: (6); CREBs: (6). \* PPI experimentally recognized (17 times).

The others 3 different sets had 212 sequences each one. \* PPI experimentally recognized for the others groups were as a follow: group 2 (14 times); group 3 (14 times); group 4 (14 times).

Group 1

| Descriptors Query | EIIP JAK1   | IC JAK1      | H085 JAK1 | H371 JAK1     | HYDRO JAK1 | VSC JAK1      | P1 JAK1  | P2 JAK1   | SASA JAK1     | NCISC JAK1    |
|-------------------|-------------|--------------|-----------|---------------|------------|---------------|----------|-----------|---------------|---------------|
| 1                 | NFAT-2      | CD166        | PTK2      | ESAM          | RPS6KA5    | PI3KIBG       | MAP3K6   | PI3KIBG   | MAPKAPK3      | MAP3K6        |
| 2                 | MADCA       | ELF4B        | APBA1     | PTK2          | Nfkappaβ   | MAP3K72       | PTK2     | MAP4K1    | TRAF2         | Ser/threN2    |
| 3                 | ANGL3       | S6kinaseβ1   | AKTRACA   | TRADD         | PKNN3      | Ser/threN12   | IKKb     | MAP3K12   | MAP3K72       | TYK2*         |
| 4                 | STAT5A*     | MAP3K6       | RPS6KA5   | MAP4K2        | PKCα       | JAK3*         | Nfkappaβ | MAP3K72   | Sgk12         | STAT1*        |
| 5                 | MAP2K4      | PKCα         | STK       | ForkheadboxO3 | PI3KIBR5   | AFAP1         | ITB2     | MAP3K7    | HIF1B         | 2AAA          |
| 6                 | STAT5B*     | VCAM1        | PI3KIBG   | SMAD5         | FOS        | CD166         | PKNN3    | HIF1B     | TFDP1         | PI3KIBG       |
| 7                 | P38         | STAT6*       | SYK*      | STAT1*        | RIP1       | caspase-9     | IRAK1    | CD22      | MST2          | MAPK1         |
| 8                 | PAK2        | SP1          | TRAF3     | MAPK13        | Ser/threN2 | MAP3K8        | MAP3K5   | PKNN3     | NOSe          | Mdm2          |
| 9                 | ELK1        | PI3KD        | MAP3K14   | ACTN1         | CEBPB      | MAPKAPK3      | STAT4    | STAT4     | STAT5B*       | MAP3K14       |
| 10                | Ser/threN12 | RELB         | MNK2      | ELK4          | STAT1*     | PKNN3         | MAP4K1   | CREB3B    | S6kinaseβ1    | PI3KRG        |
| 11                | 2AAA        | NFAT4        | STAT4     | PI3KD         | E2F4       | HIF1A         | RPS6KA5  | STK       | PAK1          | STAT2*        |
| 12                | JAM1        | PAK2         | NFAT-2    | TRAF3         | APBA1      | NFAT-2        | PI3KRB   | MAP3K2    | forkheadboxO3 | CREB1         |
| 13                | S6kinaseβ2  | CEBPB        | HIF1A     | MAPKAPK5      | MAP3K13    | CREB1         | PI3KIA   | CREB1     | MAP4K1        | ELF4E1B       |
| 14                | MAPKAPK3    | STAT5B*      | PKAα1     | CEBPB         | SP1        | NOSe          | B-raf    | MAP3K7    | Ser/threN2    | MAP2K2        |
| 15                | Rap-1A      | Amyloid β A4 | SMAD9     | TFDP1         | CREB4      | forkheadboxO3 | ANDR     | RELA(P65) | SMAD7         | ForkheadboxO3 |
| 16                | Rap-1b      | CADM3        | ELF4E1B   | PKCgama       | PI3KIA     | MAP3K3        | SP1      | RPS6KA4   | CDC25B        | B-raf         |
| 17                | ACTN1       | AKTRACA      | TYK2*     | MAPKAPK3      | MAP3K7     | FOS           | LYAM2    | SMAD5     | B-raf         | TRAF6*        |
| 18                | PI3KB       | STK          | MAP3K1    | STK           | MAP4K4     | 2AAA          | ATF6β    | CDC25B    | MAP3K8        | CD22          |
| 19                | MAP3K7      | ELK4         | PKNN3     | NUR77         | Insulin GF | Rap-1b        | MAPK8    | TRAF2     | PTK2          | MAP3K1        |
| 20                | STAT1*      | ALS          | CASP3     | SYK*          | MAP3K6     | TRAF6*        | ELF4E2   | MYC       | MAP3K12       | PKAα1         |

Group 2

| Descriptors<br>Query | EIIP<br><u>JAK1</u> | IC<br><u>JAK1</u> | H085<br><u>JAK1</u> | H371<br><u>JAK1</u> | HYDRO<br><u>JAK1</u> | VSC<br><u>JAK1</u> | P1<br><u>JAK1</u> | P2<br><u>JAK1</u> | SASA<br><u>JAK1</u> | NCISC<br><u>JAK1</u> |
|----------------------|---------------------|-------------------|---------------------|---------------------|----------------------|--------------------|-------------------|-------------------|---------------------|----------------------|
| 1                    | ELOA2               | SRBP2             | TF3C2               | NFX1                | DMTF1                | ELF1               | SRBP2             | MTF1              | HLTF                | DMTF1                |
| 2                    | PIT1                | TFE2              | ELOA2               | TF7L1               | NFX1                 | FOXL1              | TBX3              | UBF1              | ELOA2               | TYK2*                |
| 3                    | STAT5A*             | DIDO1             | BT3L3               | POU3F3              | ELF4                 | TFCP2              | ERCC3             | HLTF              | P63                 | STAT1*               |
| 4                    | TF3C2               | SNPC3             | TRPS1               | DMRT1               | TF3C1                | JAK3*              | POU3F2            | TF2H1             | TF3C2               | ELYS                 |
| 5                    | TBX15               | GTD2B             | UBF1                | POU3F2              | TF3C5                | MITF               | STAT4             | TF3C5             | REST                | TRPS1                |
| 6                    | MITF                | STAT6*            | TF2H3               | STAT1*              | REST                 | NFIB               | DMTF1             | REST              | TFCP2               | ELOA2                |
| 7                    | KLF13               | ABCA1             | TF7L2               | HINFP               | CARTF                | MTF1               | HLTF              | POU3F4            | ELF4                | NFAT5                |
| 8                    | POU6F2              | ELYS              | STAT4               | DMTA2               | STAT1*               | NFIX               | NKX21             | ELF4              | TF2AA               | SRBP2                |
| 9                    | STAT5B*             | SP202             | LMX1B               | KLF13               | NR5A2                | NKX21              | MCAF1             | TF2AA             | MTF1                | MCAF1                |
| 10                   | PBX1                | SNPC4             | NR5A2               | TF3C4               | GTD2A                | KLF16              | DMTA2             | STAT5A* STAT5B*   |                     | TF2H4                |
| 11                   | PITX2               | TF3C5             | GATA2               | SPDEF               | ELOA2                | TF3C2              | ZN384             | EA3L2             | NFYA                | AKNA                 |
| 12                   | COT2                | POU6F2            | TYK2*               | LMX1B               | MTF1                 | DMRT1              | GT2D1             | EA3L1             | DMRT1               | UBF1                 |
| 13                   | FOXO4               | BX22              | NFIX                | FOXN1               | GATA2                | DMTA2              | ATF5              | ERCC3             | BAZ1B               | STAT2*               |
| 14                   | TBX20               | POU2F2            | FOXD2               | POU4F1              | GTD2B                | BT3L1              | NFIX              | FOXN1             | NFIB                | TBX20                |
| 15                   | DMTA2               | SALL              | NFAT5               | OLIG3               | DMRT3                | NFIA               | HSF1              | PIT1              | FOXL1               | ABCA1                |
| 16                   | TFE2                | TBX5              | NFYC                | HLTF                | NFIB                 | STAT2*             | TCFL5             | TFCP2             | ABCA1               | TF3C1                |
| 17                   | OLIG2               | TCFL5             | COT2                | FOXC1               | POU6F1               | JAK2               | POU4F1            | NKX21             | CARTF               | TF3C6                |
| 18                   | ELF2                | STAT5B*           | OLIG3               | TFE2                | P5F1B                | POU5F2             | TF2H1             | P63               | USF1                | DIDO1                |
| 19                   | HSFY1               | TF7L2             | PBX1                | LMX1A               | DMRT2                | POU2F1             | DMRTA             | POU2F2            | ERCC3               | MYT1L                |
| 20                   | GATA1               | OVOL1             | NFIA                | P63                 | T2EA                 | DMRTB              | GATA1             | KLF13             | IRF9                | BT3L2                |

Group 3

| Descriptors<br>Query | EIIP<br><u>JAK1</u> | IC<br><u>JAK1</u> | H085<br><u>JAK1</u> | H371<br><u>JAK1</u> | HYDRO<br><u>JAK1</u> | VSC<br><u>JAK1</u> | P1<br><u>JAK1</u> | P2<br><u>JAK1</u> | SASA<br><u>JAK1</u> | NCISC<br><u>JAK1</u> |
|----------------------|---------------------|-------------------|---------------------|---------------------|----------------------|--------------------|-------------------|-------------------|---------------------|----------------------|
| 1                    | SP110               | CTND1             | ZN268               | MYB                 | SATB1                | TAF11              | KDM4A             | TFEB              | MED17               | RHG35                |
| 2                    | STAT5A*             | Z280D             | PARP1               | ZBED6               | GABP1                | JAK3*              | RHG35             | HDAC4             | FOXO6               | NACAD                |
| 3                    | KDM4A               | SATB1             | RN19A               | VAX1                | PKC $\alpha$         | PAX2               | SATB1             | FOXJ2             | EF1A1               | RON                  |
| 4                    | MYBB                | ZSC31             | NR2F6               | LZTL1               | MET                  | MED17              | PHC2              | FOXN4             | HDAC5               | ZN283                |
| 5                    | STAT5B*             | STAT6*            | SOX6                | HXD13               | FOXP2                | PAX3               | GATA4             | EF1A1             | MYZAP               | TYK2*                |
| 6                    | NR2F6               | RN19A             | Z280A               | NR4A2               | CTND1                | ZSC31              | STAT4             | SOX13             | MED13               | GLI2                 |
| 7                    | EPAS1               | PKC $\alpha$      | STAT4               | STAT1*              | ZN229                | TAF6               | KLF10             | WT1               | SOX13               | STAT1*               |
| 8                    | WT1                 | CMIP              | HXB7                | HXA1                | STAT1*               | HDAC5              | ZN268             | MED17             | GATA4               | MED17                |
| 9                    | ZBT17               | TEAD              | MED13               | PAX2                | VAX1                 | MET                | CCND3             | STAT5A*           | STAT5B*             | ZN521                |
| 10                   | Z280A               | MET               | HXD11               | NCUG1               | KLF10                | EGR2               | FOXH1             | FOXO6             | ZFY16               | MK01                 |
| 11                   | AP2E                | TCEA3             | ZN112               | SEBOX               | ZN223                | FOXJ2              | TAF9B             | ATOH8             | SOLH1               | MYBB                 |
| 12                   | ZN112               | ZN521             | TYK2*               | GATA6               | HLX                  | EF1A1              | EGR2              | GATA4             | MLXPL               | PRDM2                |
| 13                   | EMX1                | TAF9B             | MK01                | TEAD                | ZN233                | ZN224              | RMP               | FOXP2             | TAF7                | GABP1                |
| 14                   | NR4A2               | HLX               | AP2E                | TF3B                | GATA6                | HXB3               | ZBT17             | TAF11             | Z280D               | ZFY16                |
| 15                   | KLF5                | XRCC5             | STAT3*              | FOXN4               | NOC2L                | PTTG               | HXC4              | GABP1             | TAF11               | MED13                |
| 16                   | ZSC31               | ZBED6             | GATA6               | XRCC5               | FOXJ2                | GATA4              | SOX18             | ZN711             | HXB3                | FOXP2                |
| 17                   | EF1A1               | STAT5B*           | ZFY16               | RAB23               | FOXN4                | MYBB               | AN30B             | MET               | TEAD                | NR4A2                |
| 18                   | FOXR2               | MYB               | STAT5A*             | SP8                 | MESP2                | SOX13              | EPAS1             | MYBB              | XRCC6               | CHCH3                |
| 19                   | FOXJ2               | CCND3             | SMCA5               | TCF21               | TAF7                 | DPF1               | CMIP              | HXB2              | MYBB                | STAT2*               |
| 20                   | PTTG                | ZN155             | ATOH8               | SP110               | HDAC4                | CHCH3              | ZKSC3             | HXD12             | TCEA3               | ZN260                |

Group 4

| Descriptors | EIIP        | IC          | H085        | H371        | HYDRO       | VSC         | P1          | P2          | SASA        | NCISC       |
|-------------|-------------|-------------|-------------|-------------|-------------|-------------|-------------|-------------|-------------|-------------|
| Query       | <u>JAK1</u> | <u>JAK1</u> | <u>JAK1</u> | <u>JAK1</u> | <u>JAK1</u> | <u>JAK1</u> | <u>JAK1</u> | <u>JAK1</u> | <u>JAK1</u> | <u>JAK1</u> |
| 1           | STAT5A*     | T22D1       | ZN226       | SOX5        | WWP2        | NR2C2       | MEIS2       | WDR60       | NR2C2       | RPB2        |
| 2           | ZBTB1       | STAT6*      | RPS6KA5     | ETS2        | RPS6KA5     | WWP2        | COE1        | ADNP        | HDAC7       | ZN410       |
| 3           | TR19L       | CTDP1       | PKCT        | STAT1*      | ZBTB1       | PIAS1       | ZN148       | ENC1        | WWP2        | TYK2*       |
| 4           | STAT5B*     | BACH1       | HDAC1       | ZN148       | T22D1       | ADNP        | RPS6KA1     | GIT1        | ADNP        | S6OS1       |
| 5           | MCM8        | PAX7        | HDAC9       | KLF8        | EDEM2       | ZHX1        | BACH1       | HDAC7       | ZHX1        | STAT1*      |
| 6           | GIT1        | THOC2       | ITCH        | SG3A1       | STAT1*      | JAK3*       | STAT4       | STON1       | HXD1        | RPS6KA1     |
| 7           | NR0B2       | NR1I2       | HXC12       | NLTP        | SG3A1       | MED6        | TEAD1       | MED6        | STAT5B*     | EF1D        |
| 8           | HDAC9       | NR1I2       | MNDA        | HES1        | SOX8        | HDAC1       | RPS6KA5     | TN13B       | GIT1        | ZBTB1       |
| 9           | ZN398       | SOX30       | BACH1       | NAB2        | NLTP        | STON1       | HXA3        | BCL10       | HDAC1       | NR1I2       |
| 10          | HXD1        | BRD8        | STAT4       | DLX3        | ZN148       | REQU        | ZBED1       | STAT5A*     | CCND1       | SOX4        |
| 11          | HES1        | MED24       | TAF5L       | PPARD       | PPARD       | KCC1A       | EZH2        | NR1I2       | HXC10       | BRD8        |
| 12          | NFE2        | RPS6KA1     | CCND1       | SOX21       | IRX3        | KLF3        | SOX5        | NR2C2       | MYCN        | STON1       |
| 13          | HIF1N       | MTG8        | TYK2*       | CREM        | PKCE        | PKCE        | ITCH        | MD2L2       | CEBPG       | STAT2*      |
| 14          | SG3A1       | STAT5B*     | IRF5        | RUVB2       | EMX2        | PLK1        | PKCB        | RAB17       | ITCH        | PRKDC       |
| 15          | CREM        | ZHX1        | HXA9        | WNT16       | COE3        | CEBPG       | BRD8        | CEBPG       | THOC2       | ZHX1        |
| 16          | IRF1        | PKCE        | MTG8        | CCND1       | SIAH1       | CCND2       | VSX1        | REQU        | MDM2        | ZMYM2       |
| 17          | MED23       | TEAD1       | RUVB2       | RAB17       | NR2C2       | GSX1        | TAF10       | SOX21       | NAB2        | SIR6        |
| 18          | HXC11       | SG3A2       | RASH        | NFE2        | MTG8        | NR0B2       | SOX21       | RHXF1       | ENC1        | MDM2        |
| 19          | ZN226       | MDM2        | STAT3*      | MED24       | DLX5        | MED24       | SOX14       | HXD1        | RPB4        | MNDA        |
| 20          | SPOP        | NR1H4       | COE3        | MTG8        | HDAC7       | MD2L2       | DEDD        | KAD6        | REQU        | KLF6        |

**Supplementary S4:** Validation through MSCA for Toxoplasma ROP16 interactions under 11 physicochemical descriptors with a set of 332 sequences. Proteins are sorted according to their spectral similarity with the sequence query, similarities above 0.7 are shown. Occurrences are as a follow. Red: STATs family (18 times); Green: kinases; Blue: cell-cell adhesion proteins (36 times); yellow: IRG (11 times); brown: CREBs: (9 times); Cyan: Toxoplasma ROPs (9 times). \* PHIs experimentally recognized (4 times). IRGQh (human IRG); IRGbm (mouse IRG)

| DESCRIPTORS | EIIP     | IC                 | P001               | H085               | H371          | HYDRO              | VSC                | P1             | P2           | SASA      | NCISC              |
|-------------|----------|--------------------|--------------------|--------------------|---------------|--------------------|--------------------|----------------|--------------|-----------|--------------------|
| QUERY       | ROP16    | ROP16              | ROP16              | ROP16              | ROP16         | ROP16              | ROP16              | ROP16          | ROP16        | ROP16     | ROP16              |
| 1           | MAP3K3   | IRGQh              | ADA10              | Amyloid $\beta$ A4 | IRGb1m        | STAT1*             | ELF4B              | ROP18          | CD22         | STAT5B    | PKC $\alpha$       |
| 2           | CREB5D   | TAU(MAPT)          | forkheadboxO3      | ROP5               | IKKb          | STAT2              | AFAP1              | MAPK8          | CDC25B       | LRFN3     | AKT2RAC $\beta$    |
| 3           | CD166    | ROP11              | HIF1B              | Amyloid $\beta$ A  | TRAF2         | IRGQh              | CD22 m             | HSF1           | MAP4K1       | HSF1      | B-raf              |
| 4           | HSF1     | SMAD4              | AFAP1              | STAT4              | forkheadboxO3 | GBP2               | P100               | TRAF5          | P100         | Sgk12     | IGTPm              |
| 5           | MAPKAPK2 | IKKb               | P100               | RELB               | MAP3K2        | IL23R              | MAP4K1             | ATG3           | HSF1         | IKKg-nemo | LYAM1              |
| 6           | AJUBA    | S6kinase $\beta$ 2 | HSF1               | RIP1               | MADCA         | STAT5A             | TAU(MAPT)          | MAP3K7         | PI3KIBR5     | E2F4      | PKCZ2              |
| 7           | TRAF5    | S22A4              | STAT5A             | VCAM1              | FOXO1         | MLTK               | SMAD4              | CREB5D         | LRFN3        | STK       | ELF4E1B            |
| 8           | CEBPB    | STK                | STAT5B             | ANGL3              | ROP20         | B-raf              | TM9S1              | PDK1           | ROP11        | ELF4B     | GBP6               |
| 9           | E2F5     | ELK4               | PKNN3              | ATF6 $\beta$       | IRAK1         | STAT5B             | RELB               | CASP3          | MAP3K72      | MNK1      | MAPK1              |
| 10          | SGPP1    | CD166              | STAT4              | TRIF               | PKC $\beta$ 2 | MAP3K73            | AMRA1              | CREB1          | STAT5B       | STAT5A    | CK2                |
| 11          | IIGP5    | CEAM1              | PI3KIA             | MAP3K6             | ERBB2         | HIF1B              | E2F4               | TRADD          | ATF6 $\beta$ | CK2       | caseinkinase       |
| 12          | GBP1     | ATG3               | Amyloid $\beta$ A4 | B-raf              | MAPKAPK3      | PKNN3              | ATF6 $\beta$       | IRGb2m         | RELA(P65)    | ELK4      | NFAT-2             |
| 13          | ELK4     | MAP2K2             | ICAM1              | Ser/threN2         | CEBPB         | MAP3K12            | Amyloid $\beta$ A4 | IRGQh          | AFAP1        | TFDP1     | NBR1               |
| 14          | ATG10    | CD22               | MAP3K14            | SYK                | MNK1          | JAK3               | MNK1               | AJUBA          | AMRA1        | SMAD4     | PKA $\gamma$       |
| 15          | MAP2K6   | JAM1               | CADM1              | STAT5B             | ELF4B         | Amyloid $\beta$ A4 | glycoskinase       | ROP31          | NFAT4        | MAP2K2    | MAP3K3             |
| 16          | SOX2     | ATG10              | NOSe               | NOSe               | IKba          | NOD2               | STAT5A             | ROP17          | CREB1        | MAP4K1    | ROP31              |
| 17          | cJUN     | TRAF5              | LRFN3              | Sgk31              | AJUBA         | RPS6KA4            | MAP3K2             | PKA $\gamma$   | STAT5A       | ROP11     | NFAT2              |
| 18          | HSP27    | IL1B               | RPTOR              | NFAT-2             | PI3KIA        | STAT6*             | MAP3K12            | Sgk2           | ANDR         | SHLB1     | S6kinase $\beta$ 2 |
| 19          | ELF4E    | AFAP1              | STAT6*             | MAPK8              | RPTOR         | IRGC1m             | ELK4               | AKTRACB2       | SMAD5        | RELB      | PI3KD              |
| 20          | LTOR1    | IL23R              | ICAM5              | MAP2K2             | STAT4         | NBR1               | MAP3K72            | PAK2           | IGTPm        | MAPKAPK2  | Mdm2               |
| 21          | MAP3K2   | S22A5              | ITB2               | RPTOR              | ANGL3         | GBP1               | TRAF5              | PKA $\alpha$ 1 | CK2          | CREB1     | 2AAA               |
| 22          | MAP2K1   | ATG12              | ATG7               | ACVL1              | MAP3K14       | MEF2C              | NFAT-4             | PI3KB          | PK3C3        | CD22      | ATG13              |
| 23          | CEAM1    | MAPK1              | SYK                | MAPK1              | CADM3         | MAP4K3             | IKKm               | IRAK4          | MAP4K4       | ANDR      | MAP3K14            |
| 24          | IRGb1m   | CEBPB              | MTOR               | GBP5               | STAT3*        | JAK1               | IKKg-nemo          | SOX2           | ELK4         | IRGM2m    | Sgk12              |
| 25          | ICAM2    | RAS precur         | ser/thrN12         | IRGb1m             | E2F5          | NFkappaB           | CREB1A             | AMBP           | MAPK12       | CADM1     | PI3KRG             |



**Supplementary S5:** Validation through MSCA for Toxoplasma ROP18 interactions under 11 physicochemical descriptors with a set of 332 sequences. Proteins are sorted according to their spectral similarity with the sequence query, similarities above 0.7 are shown. Occurrences are as a follow. Green: kinases; Blue: cell-cell adhesion proteins (15 times); yellow: IRG (21 times); brown: CREBs: (15 times); gray: GBPs (10 times); purple: SMAD (11); Cyan: Toxoplasma ROPs (13 times). \* PHIs experimentally recognized (20 times). (\* PPIs, ROP18-ROP17)

| DESCRIPTORS | EIIP    | IC       | P001       | H085         | H371           | HYDRO    | VSC       | P1           | P2         | SASA       | NCISC         |
|-------------|---------|----------|------------|--------------|----------------|----------|-----------|--------------|------------|------------|---------------|
| QUERY       | ROP18   | ROP18    | ROP18      | ROP18        | ROP18          | ROP18    | ROP18     | ROP18        | ROP18      | ROP18      | ROP18         |
| 1           | TRAF6   | ROP31    | CEAM1      | STK          | ELK4           | IRGb2*   | AKTRACA   | CREB2        | TFDP1      | IRGb2*     | ATG13         |
| 2           | ROP20   | ROP20    | MAP3K7     | MNK2         | PDCD4          | SMAD1    | IRGb1m*   | HSF1         | S6kinaseβ2 | TFDP1      | TM9S1         |
| 3           | IRG6a*  | TRAF6    | GBP3       | TRAF3        | CK2            | GBP5     | MAP3K2    | PI3KRG       | IRGb1m*    | AJUBA      | MAP3K2        |
| 4           | STAT4   | CREB3    | IKKg-nemo  | AKTRACA      | SHLB1          | IRGC1*   | STK       | PAK2         | Sgk2       | STK        | IRGC1*        |
| 5           | NUR77   | ANGL3    | CDC25B     | PKAα1        | IRGM1m*        | SFR      | AKTRACB2  | Sgk2         | STK        | TRAF2      | CREB1         |
| 6           | MAP3K3  | PKCZ2    | P100       | PKCZ2        | IRGM2m*        | GBP6     | MAP2K4    | P53          | TRAF2      | IRGb1m*    | ATG7          |
| 7           | TRAM    | RELB     | MAPK10     | GBP5         | TFDP1          | MNK2     | MAP3K11   | ROP16        | AKTRACB2   | AKTRACA    | PI3KRG        |
| 8           | CREB1A  | TRAF5    | MAPK13     | PDCD4        | TRAF3          | SMAD5    | CADH1     | JAK2         | ROP39      | IRGM2m*    | IRGQh         |
| 9           | AKTRACA | ROP17*   | GBP4       | MEF2C        | ESAM           | GBP4     | MAPKAPK3  | CREB1        | MAP3K7     | ROP39      | ROP39         |
| 10          | STAT3   | PAK2     | HIF1B      | caseinkinase | BECN1          | CREB4    | ERBB2     | TYK2         | HSF1       | SHLB1      | SP1           |
| 11          | S22A4   | MAPK8    | P53        | CREB1A       | ELK1           | E2F4     | TFDP1     | MAP4K2       | MAPKAPK2   | S6kinaseβ2 | B-raf         |
| 12          | HIF1B   | IRGM1m*  | IRGM2m*    | MAPK1        | ROP31          | JAK3     | PKCβ2     | MAPK8        | MEK1       | RAF        | GBP3          |
| 13          | ATG10   | BECN1    | STK        | S6kinaseβ2   | caseinkinaseII | Sgk12    | MAPK11    | ERBB2        | SMAD5      | Insulin GF | IRAK1         |
| 14          | FOXO1   | CREB3B   | ATG7       | GAD153       | AKT2RACB2      | GBP2     | IKba      | PDK1         | MAP3K2     | MAPKAPK2   | ATF6β*        |
| 15          | MAP3K14 | MAP3K72  | RELB       | AKTRACB2     | MAPK13         | Sgk31    | caspase-9 | MAP3K8       | MAP3K11    | HSF1       | MAP3K73       |
| 16          | RAC1    | IIGP5    | TYK11      | ELF4E1B      | CREB3          | SQSTM    | ELK1      | Amyloid β A4 | CADH1      | MAPKAPK3   | S6kinaseβ2    |
| 17          | ROP39   | TIRAP    | ROP39      | PI3KB        | TRADD          | PI3KIBR5 | IRGM2m*   | ATG13        | ESAM       | PKCβ2      | SMAD4         |
| 18          | MAP3K72 | MEF2C    | ITB2       | ESAM         | ELF4E          | CREB3B   | MNK1      | MAPKAPK3     | E2F4       | Sgk2       | forkheadboxO3 |
| 19          | ATG5    | SMAD5    | S22A4      | MAPK8        | CREB3B         | STAT5A   | P38       | RIP1         | Insulin GF | SMAD7      | Mdm2          |
| 20          | GBP6    | AKT2RACβ | E2F4       | SMAD9        | MADCA          | P53      | PKAPRKX   | NOD2         | AKT2RACβ   | MEK1       | MAP2K2        |
| 21          | MAP2K4  | STK      | AFAP1      | Mdm2         | ELF4E1B        | STAT5B   | IRGb2*    | IRGb2*       | ELF4B      | MAPK3      | BCL9          |
| 22          | SFR     | PI3KRB   | RPS6KA5    | CASP3        | SMAD5          | RIP1     | SMAD3     | ROP31        | IRGQh      | GBP3       | JAK1          |
| 23          | ATG13   | ACVL1    | S6kinaseβ2 | ELF4B        | ACVL1          | CREB1    | Sgk2      | IRGC1*       | STAT2      | IKba       | Amyloid β A4  |
| 24          | TYK11   | MNK1     | EVA1A      | ELK4         | BCL2           | MAP2K2   | SOX2      | ADA10        | IRGb2*     | ESAM       | MAP4K3        |
| 25          | MAP3K13 | IRGM2m*  | TRAF6      | SMAD5        | SMAD9          | TIRAP    | ROP20     | PKAα1        | SRF        | CADM1      | sere/thrN12   |

**Supplementary S6:** Validation through MSCA for Toxoplasma ROP17 interactions under 11 physicochemical descriptors with a set of 332 sequences. Proteins are sorted according to their spectral similarity with the sequence query, similarities above 0.7 are shown. Occurrences are as a follow. Green: kinases; Blue: cell-cell adhesion proteins (24 times); yellow: IRG (20 times); brown: CREBs: (11 times); gray: GBPs (17 times); purple: SMAD (9); Cyan: Toxoplasma ROPs (9 times). \* PHIs experimentally recognized (12 times). (\* PPI, ROP17-ROP18 and ROP17-ROP5).

| DESCRIPTORS | EIIP       | IC        | P001       | H085       | H371     | HYDRO     | VSC           | P1           | P2       | SASA      | NCISC      |
|-------------|------------|-----------|------------|------------|----------|-----------|---------------|--------------|----------|-----------|------------|
| QUERY       | ROP17      | ROP17     | ROP17      | ROP17      | ROP17    | ROP17     | ROP17         | ROP17        | ROP17    | ROP17     | ROP17      |
| 1           | AKT2RACβ   | GBP3      | MAP3K7     | PKCγ       | RAF      | STK       | GBP7          | MAP3K3       | GBP2     | Sgk12     | AKT1RACG2  |
| 2           | IL23R      | TRAF5     | E2F4       | SP1        | PAK2     | AJUBA     | SMAD4         | STAT1        | CREB1    | IRGQh     | P53        |
| 3           | TRAF6      | PKCZ2     | RELA(P65)  | PKCα       | STAT6    | GBP3      | IRGQh         | CREB1        | GBP5     | MAP3K3    | ROP39      |
| 4           | S6kinaseβ2 | SMAD4     | MAPK13     | ser/threN2 | ROP39    | ROP39     | IKKg-nemo     | S22A5        | Sgk2     | IRGM2m*   | PKCZ2      |
| 5           | RELA(P65)  | MAP2K2    | ATG13      | MAP3K7     | IL23R    | LRFN3     | ROP11         | Amyloid β A4 | PKCα     | AKTRACA   | MAP4K1     |
| 6           | IKKa       | HSF1      | LYAM2      | PKAα1      | MADCA    | MAP3K7    | caspase-9     | NBR1         | IRGQh    | GBP2      | GBP5       |
| 7           | ESAM       | TIRAP     | IGTPm      | STK        | MAP3K3   | FOS       | P38           | PKCα         | AKT2RACβ | STK       | IRG6a*     |
| 8           | ICAM5      | ROP18*    | CREB5D     | HIF1A      | ANGL3    | E2F4      | S22A4         | AFAP1        | SMAD4    | SMAD2     | LRFN3      |
| 9           | STAT6      | SMAD5     | PKCγ       | IGTPm      | SQSTM    | MADCA     | IIGP5         | Mdm2         | ALS      | GBP5      | SMAD3      |
| 10          | IRGM1m*    | ELF4E     | RXR        | TM9S1      | MAPK11   | CREB2     | RAF           | MAP3K6       | IRGb1m*  | PAK1      | ELF4B      |
| 11          | MAPKAPK5   | CREB3B    | CREB2      | PKCβ2      | SMAD9    | CEBPB     | TRAF3         | IRGQh        | IGTPm    | IKKb      | ATG3       |
| 12          | AKT1RACG2  | CREB1     | MAP3K14    | SGPP1      | MAPK10   | TAU(MAPT) | GBP2          | B-raf        | AJUBA    | CREB1     | PI3KIBR5   |
| 13          | GBP5       | MAP3K2    | NUR77      | IKKa       | ROP20    | 2AAA      | ELF4B         | PAK1         | SGPP1    | GBP4      | PKAγ       |
| 14          | MAP3K3     | Jun-D     | CEAM1      | MAP4K3     | TRAF3    | ICAM2     | MLTK          | PKCβ2        | IRGC1*   | ANGL3     | TFDP1      |
| 15          | TAU(MAPT)  | GADD153   | IRGM2m*    | IL23R      | TRAF5    | TYK11     | PKCα          | GBP1         | MLP3B    | CADM1     | S6kinaseβ1 |
| 16          | ELK1       | AJUBA     | RIP1       | B-raf      | IRGb1m*  | IKKg-nemo | STK           | MAPKAPK3     | MAP3K2   | SMAD4     | MAP3K72    |
| 17          | SMAD5      | RELA(P65) | PKAγ       | PITX2      | AKT2RACβ | PI3KB     | IRGM1m*       | MAP2K1       | CDC25B   | TRAF2     | RELA(P65)  |
| 18          | ITB2       | NOD2      | IRGa6*     | TRAF3      | STAT4    | RELB      | PAK1          | PDK1         | Sgk31    | AKT1RACG2 | TYK11      |
| 19          | PITX2      | CREB3     | IIGP5h     | AKTRACA    | CK2      | CADM3     | IGTPm         | IL23R        | KRasb    | MLTK      | PI3KRG     |
| 20          | ROP39      | TRAF2     | ESAM       | ICAM5      | ROP11    | ICAM5     | GBP4          | MAP2K2       | MLTK     | GBP7      | STAT2      |
| 21          | ATG3       | B-raf     | JAM1       | PDK1       | ELK1     | MAP3K72   | STK           | CREB2        | Rap-1b   | RELA(P65) | STAT1      |
| 22          | ROP5*      | MAPK1     | CREB1      | ELK4       | CADM3    | IRGM2m*   | E2F4          | TYK2         | PKCγ     | MAP2K1    | IRGb2*     |
| 23          | Rap-1A     | PITX2     | PDK1       | GAD153     | IRGM1m*  | PI3KRB    | ALS           | MAP4K4       | CASP3    | ROP31     | PKAβ4      |
| 24          | SOX2       | MAP3K3    | MAPK3(ERK) | MEKK1      | P53      | MAP2K2    | ATG7          | HIF1B        | GBP7     | PKNN3     | PAK2       |
| 25          | CDC42      | CEAM1     | GBP2       | STAT6      | GBP4     | AMBP      | glycosykinase | ADA10        | ATG3     | PKCβ2     | PDK1       |

**Supplementary S7:** Validation through MSCA for Toxoplasma ROP5 interactions under 11 physicochemical descriptors with a set of 332 sequences. Proteins are sorted according to their spectral similarity with the sequence query, similarities above 0.7 are shown. Occurrences are as a follow. Green: kinases; Blue: cell-cell adhesion proteins (9 times); yellow: IRG (17 times); brown: CREBs: (16 times); gray: GBPs (9 times); purple: SMAD (11); Cyan: Toxoplasma ROPs (12 times). \* PHIs experimentally recognized (9 times). (\* PPI, ROP5-ROP17).

| DESCRIPTORS | EIIP       | IC           | P001   | H085          | H371     | HYDRO     | VSC      | P1        | P2       | SASA     | NCISC     |
|-------------|------------|--------------|--------|---------------|----------|-----------|----------|-----------|----------|----------|-----------|
| QUERY       | ROP5       | ROP5         | ROP5   | ROP5          | ROP5     | ROP5      | ROP5     | ROP5      | ROP5     | ROP5     | ROP5      |
| 1           | ELK1       | ANGL3        | RXR    | ROP39         | HSF1     | CREB1     | CREB1    | TYK11     | IRGb1m*  | CREB1    | STK       |
| 2           | CREB3B     | S6kinaseβ1   | STK    | STK           | SMAD5    | STK       | MAP2K4   | GBP5      | E2F4     | IRGb1m*  | IRGb2*    |
| 3           | TFDP1      | TRAF3        | E2F4   | ROP16         | STK      | caspase-9 | SHLB1    | MAP3K3    | ATG13    | SHLB1    | PI3KB     |
| 4           | CREB4      | CREB3B       | IRG6a* | MAP3K72       | GBP4     | ROP11     | IRGb2*   | IKKb      | SHLB1    | MAPKAPK3 | PI3KRG    |
| 5           | S6kinaseβ2 | CDC25B       | CREB1  | AFAP1         | IKKb     | SMAD5     | IRGM2m*  | PI3KB     | AKTRACB2 | IRGM2m*  | S22A5     |
| 6           | MAP2K4     | CREB1        | MAPK12 | GBP2          | TYK11    | ELF4E2    | PKCβ2    | 2AAA      | ELK1     | IRGb2*   | MAPK1     |
| 7           | IRGM1m*    | RAF          | IIGP5  | MAPK8         | MEF2C    | IRGb2*    | E2F4     | Sgk31     | CREB3B   | IKba     | RIP1      |
| 8           | P38        | CREB3        | LYAM2  | CDC25B        | ELK1     | ELF4E     | BECN1    | MAPKAPK5  | GBP3     | MLP3B    | NUR77     |
| 9           | RAF        | ROP31        | S6     | ANGL3         | ROP20    | ICAM2     | SMAD3    | MAP3K8    | CREB5D   | Mdm2     | ATG13     |
| 10          | ROP31      | PI3KB        | PI3KB  | GBP1          | TYK2     | CASP3     | IRAK1    | MAPKAPK3  | RAF      | MAP2K1   | RPS6KA5   |
| 11          | PAK2       | AKTRACA      | CADM1  | STAT6         | MAP3K3   | PDCD4     | MLP3B    | MYC       | MLP3B    | SMAD2    | AKTRACB2  |
| 12          | MAPK10     | RELA(P65)    | STAT4  | SYK           | MAPK10   | GBP5      | MAPK12   | MAP2K2    | IRAK4    | GAD153   | ROP39     |
| 13          | SMAD7      | PTK2         | ELK4   | forkheadboxO3 | STAT4    | IRAK4     | ATG3     | IGTPm     | MYC      | MAPK3    | SP1       |
| 14          | MAPK8      | RPS6KA4      | CREB4  | TRIF          | AKT2RACβ | IGTPm     | ATG7     | GBP2      | ICAM1    | bcl2     | AKTRACA   |
| 15          | PI3KRA4    | RXR          | CK2    | SGPP1         | SFR      | MAP2K2    | CREB1A   | MAPK10    | SMAD7    | MAPK12   | BCL9      |
| 16          | MADCA      | MAP4K2       | CREB5D | 2AAA          | RELB     | SMAD1     | PKCα     | RXR       | Sgk2     | SMAD3    | ADA10     |
| 17          | ROP17*     | IRGM2m*      | Sgk2   | MAPK11        | CK2      | MNK2      | MAPKAPK3 | RAF       | MAPKAPK2 | ATG13    | CK2       |
| 18          | STAT2      | SMAD5        | MAPK1  | NFAT2         | SYK      | SQSTM     | SYK      | ATG7      | PKCγ     | MAPK1    | MAP3K3    |
| 19          | TRIF       | STK          | FOS    | CADH1         | TRAF3    | E2F4      | STMN1    | RELA(P65) | CADH1    | ELK1     | MAP3K2    |
| 20          | Rap-1A     | IRGQh        | MAPK13 | PKCβ2         | MAPK13   | CREB2/2   | CDK1     | MAP3K5    | CASP3    | MAP2K4   | HIF1B     |
| 21          | ROP39      | Amyloid β A4 | LTOR2  | MAP4K4        | STAT3    | ROP20     | CK2      | MAP3K11   | Mdm2     | IRGMh    | ATG3      |
| 22          | S6         | ROP20        | TRAF3  | MAP4K1        | ELF4E    | HRas1     | PKAPRKX  | MAP3K13   | PKNN3    | ROP11    | HSF1      |
| 23          | RPS6KA5    | TRAF6        | MAPK11 | CREB5D        | RAF      | ATG13     | IRGMh    | PKAα1     | IL1B     | Sgk2     | IIGP5     |
| 24          | BCL2       | MAPK8        | MAP3K7 | MLTK          | ELK4     | MAPK13    | PDK1     | PI3KD     | MAPK3    | RAC1     | TAU(MAPT) |
| 25          | HSF1       | CEBPB        | cJUN   | ACVL1         | SMAD4    | MAPK10    | STK      | TFDP1     | Rap-1b   | SMAD7    | IGTPm     |

**Supplementary S8:** MSCA interaction performance tested for 3 human proteins

| <b>Query</b> | <b>Interactions</b> | <b>p-value cutoff</b> | <b>Sensitivity</b> | <b>Specificity</b> | <b>ACC measure</b> | <b>F1 score</b> |
|--------------|---------------------|-----------------------|--------------------|--------------------|--------------------|-----------------|
| <b>JAK1</b>  | 67                  | 0.80                  | 0.58               | 0.83               | 0.70               | 0.67            |
|              |                     | 0.70                  | 0.65               | 0.62               | 0.64               | 0.64            |
| <b>MAG11</b> | 20                  | 0.80                  | 0.70               | 0.85               | 0.76               | 0.75            |
|              |                     | 0.70                  | 0.65               | 0.80               | 0.72               | 0.70            |
| <b>STAT3</b> | 101                 | 0.80                  | 0.63               | 0.89               | 0.76               | 0.72            |
|              |                     | 0.70                  | 0.62               | 0.83               | 0.72               | 0.70            |

|     | EIIP   | IC   | P001 | H371  | H085  | HYDRO | VSC   | P1   | P2    | SASA  | NCISC    |
|-----|--------|------|------|-------|-------|-------|-------|------|-------|-------|----------|
| Ala | 0.0373 | 2.3  | 4.35 | 0.937 | -0.01 | 0.62  | 27.5  | 8.1  | 0.046 | 1.181 | 0.007187 |
| Cys | 0.0829 | 1.96 | 4.65 | 1.004 | 0.12  | 0.29  | 44.6  | 5.5  | 0.128 | 1.461 | -0.03661 |
| Asp | 0.1263 | 1.88 | 4.76 | 1.640 | 0.15  | -0.9  | 40    | 13   | 0.105 | 1.587 | -0.02382 |
| Glu | 0.0058 | 2.3  | 4.29 | 0.679 | 0.07  | -0.74 | 62    | 12.3 | 0.151 | 1.862 | 0.006802 |
| Phe | 0.0946 | 1.98 | 4.66 | 0.803 | 0.03  | 1.19  | 115.5 | 5.2  | 0.29  | 2.228 | 0.037552 |
| Gly | 0.005  | 2.46 | 3.97 | 0.901 | 0.00  | 0.48  | 0     | 9    | 0     | 0.881 | 0.179052 |
| His | 0.0242 | 2.3  | 4.63 | 1.085 | 0.08  | -0.4  | 79    | 10.4 | 0.23  | 2.025 | -0.01069 |
| Ile | 0      | 2.4  | 3.95 | 0.178 | -0.01 | 1.38  | 93.5  | 5.2  | 0.186 | 1.81  | 0.021631 |
| Lys | 0.0371 | 2.2  | 4.36 | 1.254 | 0.00  | -1.5  | 100   | 11.3 | 0.219 | 2.258 | 0.017708 |
| leu | 0      | 2.4  | 4.17 | 0.808 | -0.01 | 1.06  | 93.5  | 4.9  | 0.186 | 1.931 | 0.051672 |
| Met | 0.0823 | 2.17 | 4.52 | 0.886 | 0.04  | 0.64  | 94.1  | 5.7  | 0.221 | 2.034 | 0.002683 |
| Asn | 0.0036 | 2.2  | 4.75 | 1.080 | 0.06  | -0.78 | 58.7  | 11.6 | 0.134 | 1.655 | 0.005392 |
| Pro | 0.0198 | 2    | 4.44 | 0.748 | 0.00  | 0.12  | 41.9  | 8    | 0.131 | 1.468 | 0.239531 |
| Gln | 0.0761 | 2.06 | 4.37 | 1.078 | 0.05  | -0.85 | 80.7  | 10.5 | 0.18  | 1.932 | 0.049211 |
| Arg | 0.0959 | 1.82 | 4.38 | 1.725 | 0.04  | -2.53 | 105   | 10.5 | 0.291 | 2.56  | 0.043587 |
| Ser | 0.0829 | 2.1  | 4.50 | 1.145 | 0.11  | -0.18 | 29.3  | 9.2  | 0.062 | 1.298 | 0.004627 |
| Thr | 0.0941 | 2.09 | 4.35 | 1.487 | 0.04  | -0.05 | 51.3  | 8.6  | 0.108 | 1.525 | 0.003352 |
| Val | 0.0057 | 2.35 | 3.95 | 0.625 | 0.01  | 1.08  | 71.5  | 5.9  | 0.14  | 1.645 | 0.057004 |
| Trp | 0.0548 | 2.37 | 4.70 | 0.803 | 0.00  | 0.81  | 145.5 | 5.4  | 0.409 | 2.663 | 0.037977 |
| Tyr | 0.0516 | 2.2  | 4.60 | 1.227 | 0.03  | 0.26  | 117.3 | 6.2  | 0.298 | 2.368 | 0.023599 |

Hydrophobicity (hydro); volume of side chains (VSC); polarity (P1); polarizability (P2); solvent accessible surface area (SASA); net charge index of side chains (NCISC); Electron Ion Interaction Potential (EIIP); Ionization Constant (IC); correlated with EIIP, P001, H085 and H371 proposed in (37).

## # MCSA: R code

```
remove(list=ls())
proteinas<-read.table("D:\\table.txt",fill=TRUE)
matprot<-matrix(t(proteinas),nrow=size of the first line, ncol= sequences)
mat.ser<-matprot
n<-ncol(mat.ser)
vec.prob<-array(1,n)
seriej<-mat.ser[,n]
para=0
pos=0
while(para==0){pos=pos+1
  if(is.na(seriej[pos])==TRUE){lj=pos-1
    para=1}
  if(pos==length(seriej)){lj=pos
    para=1}
}
seriejtrun<-seriej[1:lj]
for(i in 1:(n-1)){
  seriei<-mat.ser[,i]
  para=0
```

```

pos=0
while(para==0){pos=pos+1
  if(is.na(seriei[pos])==TRUE){li=pos-1
    para=1}
  if(pos==length(seriei)){li=pos
    para=1}
}
serieitrun<-seriei[1:li]
if(li<=lj){menor<-serieitrun
  mayor<-seriejtrun
  lm<-li
  lM<-lj}
if(li>lj){menor<-seriejtrun
  mayor<-serieitrun
  lm<-lj
  lM<-li}
m<-lm/2
frec<-0:m/lm
permen<-abs(fft(menor)/sqrt(lm))^2
probac<-0

```

```

cont<-0
for(k in 1:(IM-lm+1)){
  seriek<-mayor[k:(k+lm-1)]
  perk<-abs(fft(seriek)/sqrt(lm))^2
  Ji<-permen[1:m]/perk[1:m]
  zi<-as.vector(log(1+1/Ji))
  sumac<-array(0,m)
  for(l in 1:m){sumac[l]<-sum(zi[1:l])}
  max<-sumac[m]
  orden<-sumac/max
  pvalor<-ks.test(orden[2:m],"punif",0,1)$p.value
  probac<-probac+pvalor
  cont<-cont+1
}
vec.prob[i]<-probac/cont
}
ord<-sort(vec.prob,decreasing=TRUE,index.return=TRUE)
salida<-cbind(ord$x,ord$ix)
print(as.data.frame(salida))

```



## How to use MSCA: R code?

1. Transform your set of proteins under some descriptor.
2. Save on D drive your proteins as a table named **table.txt** with the largest protein in the first line of the table and query protein in the last line of the table.
3. You have to keep in mind two numbers: the **size** of the largest protein and the number of **used sequences** to replace them by `nrow= size` and `ncol=sequences`, respectively.
4. Save the code on D drive as **msca.txt**.
5. Install the R program in your computer.
6. Open the R program and write in the prompt the instruction `source("D:\\msca.txt")`.
7. The output shows the proteins sorted according their spectral similarity with the query.
